# Supplementary material for: A sensitive LC-MS/MS methotrexate assay capable of assessing adherence to methotrexate therapy in rheumatoid arthritis
Source: publisher site journal article supplement (doi:10.1515/cclm-2023-0350), 2023-08-03
Supplement: Supplementary file 1 [file j_cclm-2023-0350_suppl_001.docx]

**Supplementary Table 1- Investigation of FDA validation bioanalytical parameters**

| **Bioanalytical parameters** | **Area of methods assessing this parameter** |
| --- | --- |
| Reference standards | Paragraph 1 |
| Critical reagents | Paragraphs 1, 3 and 4 |
| Calibration curve | Paragraphs 1 and 12 |
| Quality control material | Paragraphs 1, 7 and 8 |
| Selectivity and specificity | Paragraphs 5 and 16 |
| Sensitivity | Paragraphs 14 |
| Accuracy | Paragraph 7 and 9 |
| Precision | Paragraph 8 |
| Recovery | Paragraphs 9 and 10 |
| Stability | Paragraph 17 |

The bioanalytical parameters which the FDA guideline recommends assessing in method validations (5), referenced by the section of the Materials which explains their investigation.
